# Supplementary material for: Construction of a highly efficient CRISPR/Cas9-mediated duck enteritis virus-based vaccine against H5N1 avian influenza virus and duck Tembusu virus infection
Source: PubMed Central journal article supplement (PMC5431151; doi:10.1038/s41598-017-01554-1), 2017-05-03
Supplement: 41598_2017_1554_MOESM1_ESM.pdf [file 41598_2017_1554_MOESM1_ESM.pdf]

**Construction of a highly efficient CRISPR/Cas9-mediated duck enteritis virus-based vaccine against H5N1 avian influenza virus and duck Tembusu virus infection**

Zhong Zou; Kun Huang; Yanmin Wei; Huanchun Chen; Ziduo Liu; Meilin Jin

Supplementary materials

**Supplementary Figure 1. Verification of HA and PrM-E insertion in C-KCE by PCR.**

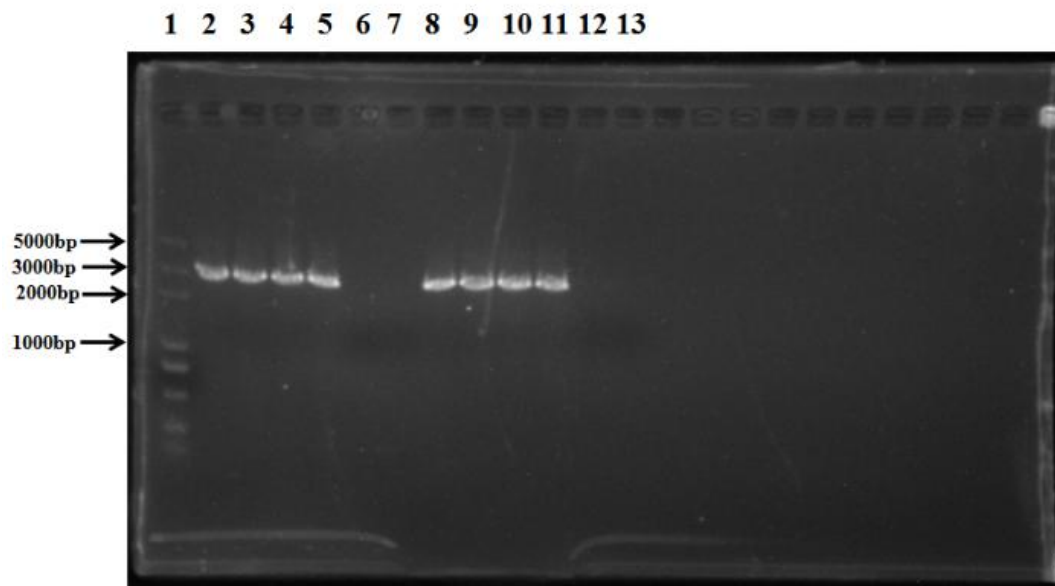

Supplementary Figure 2. Detection of HA, PrM, and E proteins expressions in C-KCE-HA/PrM-E-infected CEF cells by western blot. The precursor PrM-E, PrM, and E indicated by the red arrowhead. A and B are the different exposures.

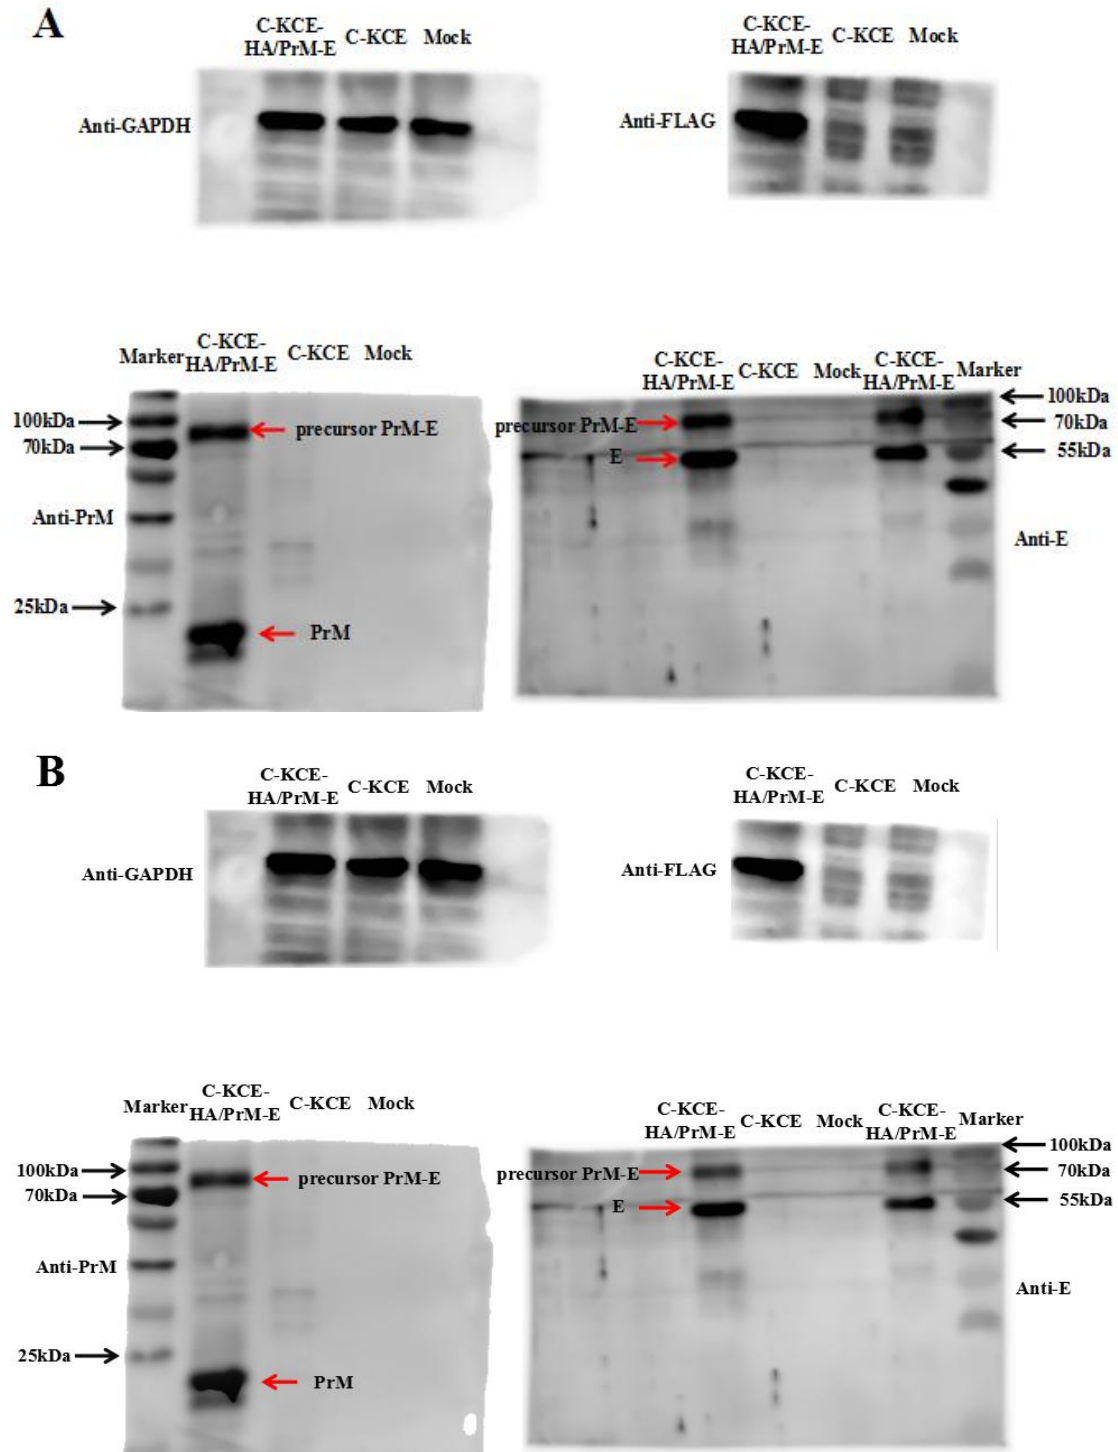

Supplementary Figure 3. Viral load in organs infected with C-KCE-HA/PrM-E or C-KCE. Ducks were vaccinated with  $10^5$  PFU of C-KCE or C-KCE-HA/PrM-E (n = 3 per group) subcutaneously. All the ducks in the two groups were humanely euthanized on day 2 post-challenge (pc), and their organs were obtained to determine virus titers using a one-step real-time TaqMan RT-PCR assay.

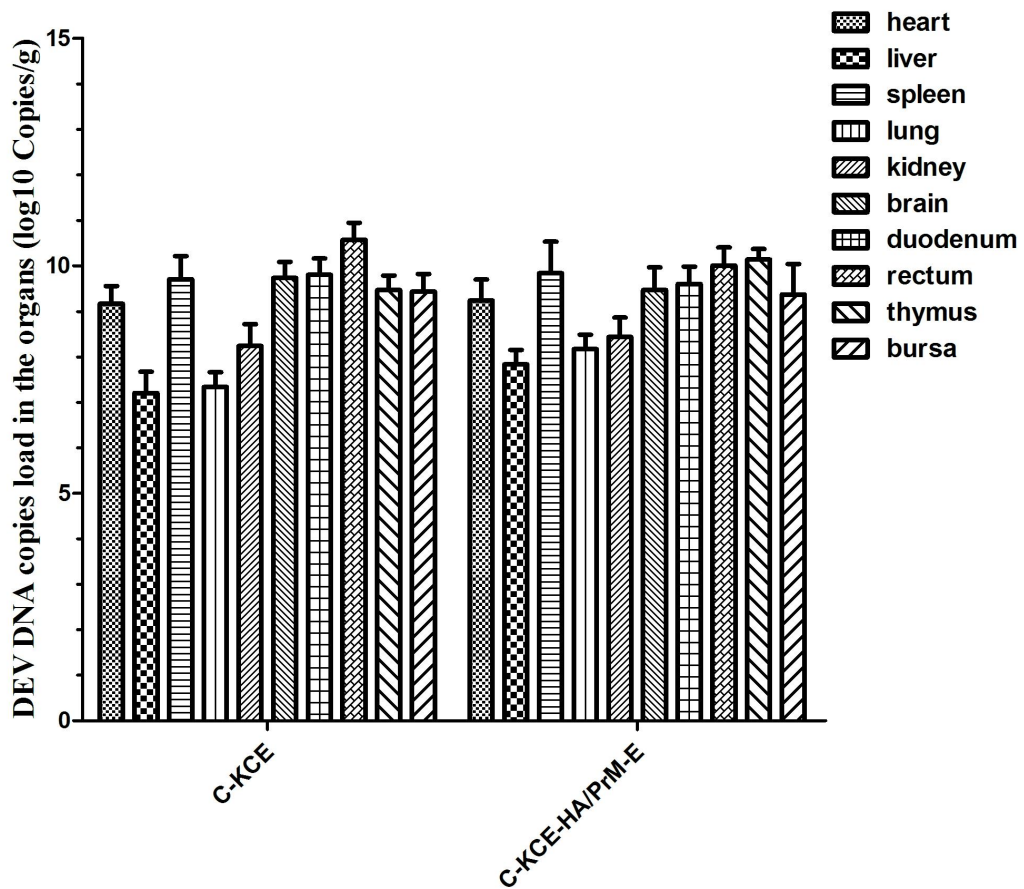

Supplementary Figure 4. Humoral immune response against virulent DEV in ducks vaccinated with C-KCE-HA/PrM-E or its parental strain C-KCE. Groups of 5 ducks were inoculated subcutaneously with  $10^5$  PFU of C-KCE-HA/PrM-E, C-KCE or with PBS as control. Sera were collected from 0 to 4 weeks to detect NT antibodies against virulent DEV in DEF cells. NT antibody titers for ducks are shown in log<sub>2</sub> scale. Dotted lines indicate the thresholds for a positive response. Data are shown as the means  $\pm$  SD. \*\* P < 0.01, \*\*\* P < 0.001.

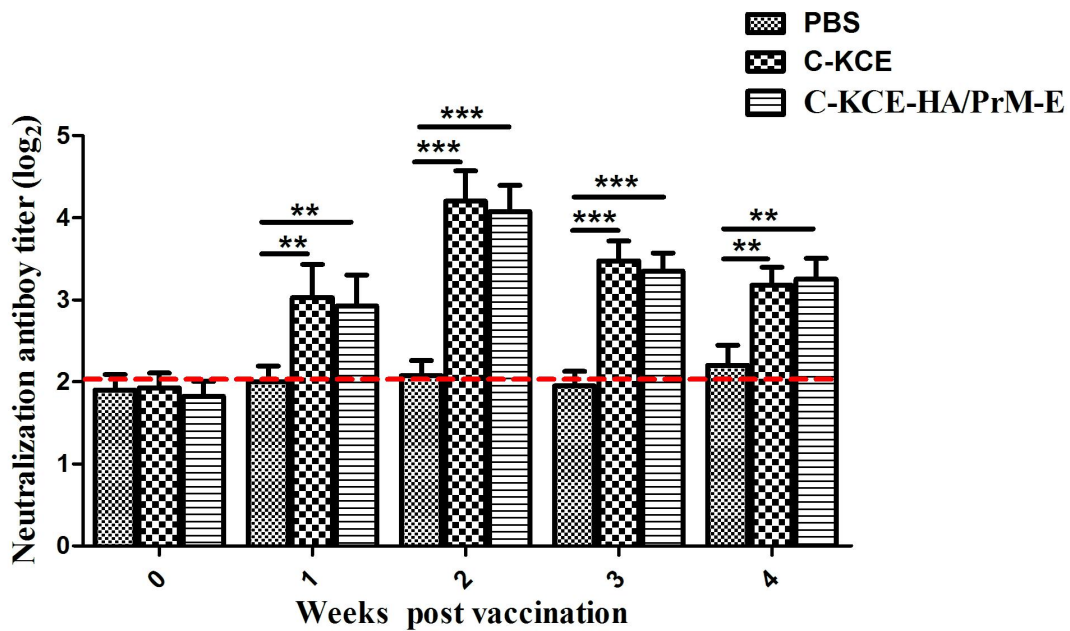

Supplementary Figure 5. HA responses were assessed against the homologous XN/07 virus. Ducks were vaccinated with PBS,  $10^5$  PFU of C-KCE or C-KCE-HA/PrM-E (n = 10 per group) subcutaneously. Sera were obtained at the indicated time points to detect HA antibodies against XN/07. Dotted lines indicate the thresholds for a positive response.

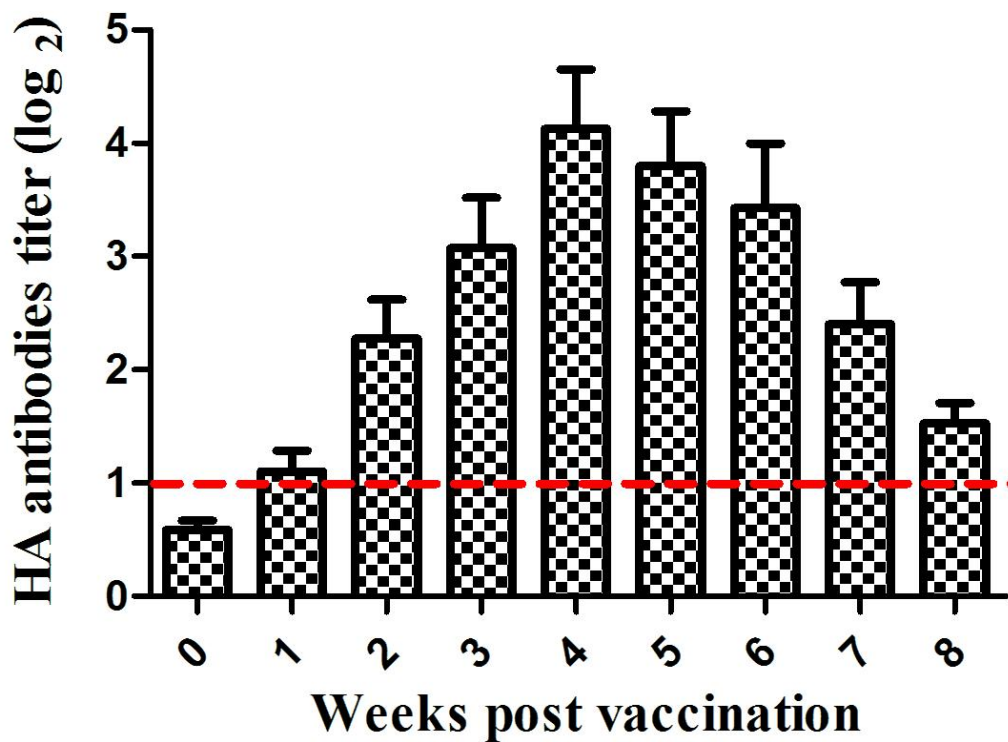

**Supplementary Table 1. Replication of challenge virus XN/07 in ducks.**

| Challenge time pv | vaccine        | Virus replication in the organs in the ducks on 3 days pv (mean $\pm$ SD, lg10EID <sub>50</sub> /g) |               |               |               |               |               |
|-------------------|----------------|-----------------------------------------------------------------------------------------------------|---------------|---------------|---------------|---------------|---------------|
|                   |                | Heart                                                                                               | Liver         | Spleen        | Lung          | Kidney        | Brain         |
| 2 weeks           | C-KCE-HA-PrM-E | /                                                                                                   | /             | /             | /             | /             | /             |
|                   | C-KCE          | 6.3 $\pm$ 1.1                                                                                       | 7.1 $\pm$ 0.5 | 6.8 $\pm$ 0.7 | 5.8 $\pm$ 1.1 | 6.5 $\pm$ 0.9 | 7.2 $\pm$ 0.6 |
|                   | PBS            | 6.7 $\pm$ 0.8                                                                                       | 6.4 $\pm$ 0.6 | 7.0 $\pm$ 0.5 | 6.8 $\pm$ 1.4 | 6.2 $\pm$ 0.8 | 7.5 $\pm$ 0.8 |
| 4 weeks           | C-KCE-HA-PrM-E | /                                                                                                   | /             | /             | /             | /             | /             |
|                   | C-KCE          | 6.4 $\pm$ 0.7                                                                                       | 5.6 $\pm$ 1.3 | 6.3 $\pm$ 1.0 | 5.4 $\pm$ 0.9 | 7.6 $\pm$ 0.4 | 7.3 $\pm$ 0.4 |
|                   | PBS            | 6.2 $\pm$ 0.5                                                                                       | 7.0 $\pm$ 0.4 | 6.8 $\pm$ 0.7 | 6.6 $\pm$ 1.2 | 7.1 $\pm$ 0.5 | 6.8 $\pm$ 0.7 |

Homologous XN/07 replication in the organs of ducks that were vaccinated with C-KCE-HA/PrM-E. Groups of three ducks were inoculated subcutaneously with 10<sup>5</sup> plaque-forming units (PFU) of C-KCE-HA, C-KCE, or PBS as a control. Subsequently, the ducks were challenged with homologous (XN/07) intramuscularly at 2 weeks or 4 weeks pv. At day 3 after challenge, the ducks were humanely sacrificed and their organs were collected for virus titration in eggs. Data represent mean titers  $\pm$  standard errors. The backslash indicates that the challenge virus was not recovered at the corresponding time point.

**Supplementary Table 2. Replication of challenge virus df2 in ducks.**

| Challenge time pv | vaccine        | Viral copy load in the organs in the ducks on 3 days pv ( mean $\pm$ SD, log <sub>10</sub> per $\mu$ g of total RNA) |                 |                 |                 |                 |                 |
|-------------------|----------------|----------------------------------------------------------------------------------------------------------------------|-----------------|-----------------|-----------------|-----------------|-----------------|
|                   |                | Heart                                                                                                                | Liver           | Spleen          | Lung            | Kidney          | Brain           |
| 2 weeks           | C-KCE-HA-PrM-E | /                                                                                                                    | /               | /               | /               | /               | /               |
|                   | C-KCE          | 5.91 $\pm$ 0.54                                                                                                      | 5.73 $\pm$ 0.28 | 6.18 $\pm$ 0.42 | 4.29 $\pm$ 0.47 | 5.16 $\pm$ 0.33 | 2.69 $\pm$ 0.43 |
|                   | PBS            | 6.13 $\pm$ 0.22                                                                                                      | 5.42 $\pm$ 0.37 | 5.78 $\pm$ 0.33 | 5.14 $\pm$ 0.26 | 5.46 $\pm$ 0.26 | 3.17 $\pm$ 0.21 |
| 4 weeks           | C-KCE-HA-PrM-E | /                                                                                                                    | /               | /               | /               | /               | /               |
|                   | C-KCE          | 5.27 $\pm$ 0.34                                                                                                      | 4.82 $\pm$ 0.33 | 5.16 $\pm$ 0.27 | 4.52 $\pm$ 0.26 | 4.27 $\pm$ 0.26 | 2.26 $\pm$ 0.52 |
|                   | PBS            | 4.66 $\pm$ 0.29                                                                                                      | 4.43 $\pm$ 0.47 | 5.45 $\pm$ 0.18 | 4.19 $\pm$ 0.33 | 4.66 $\pm$ 0.42 | 2.53 $\pm$ 0.33 |

DTMUV replication in the organs of the ducks vaccinated with C-KCE-HA/PrM-E . Groups of three ducks were inoculated subcutaneously with  $10^5$  PFU of C-KCE-HA/PrM-E, C-KCE, or with PBS as the control. Subsequently, the ducks were challenged with df2 intramuscularly at 2 weeks or 4 weeks pv. Ducks were euthanized on day 3 post-challenge, and their organs were harvested for virus titration utilizing the quantitative RT-PCR assay. Data are expressed as means  $\pm$  standard deviations of log<sub>10</sub>. The backslash indicates that the challenge virus was not recovered at the corresponding time point.
